# Supplementary material
Source: PubMed Central journal article supplement (PMC1414550)
Supplement: biophysj_105.069278_1.pdf [file biophysj_105.069278_1.pdf]

Below, we outline a necessary and sufficient condition for producibility in the context of thermodynamic (irreversibility) constraints. Please refer to the main paper for terminology and mathematical preliminaries.

**Lemma 1.** *Given  $A \in \mathbb{R}^{m \times n}$  and arbitrary  $i = 1, \dots, m$ , exactly one of the following two sets is empty (non-empty):*

$$\{w \in \mathbb{R}^n \mid Aw \geq 0, (Aw)_i > 0\} \quad (1)$$

$$\{y \in \mathbb{R}^m \mid A^T y = 0, y \geq 0, y_i > 0\} \quad (2)$$

**Lemma 2.** *Given  $A \in \mathbb{R}^{m \times n}$ , arbitrary  $i \in 1, \dots, m$ , and  $T \subset 1, \dots, n$ , exactly one of the following two sets is empty (non-empty):*

$$\{w \in \mathbb{R}^n \mid Aw \geq 0, w_T \geq 0, (Aw)_i > 0\} \quad (3)$$

$$\{y \in \mathbb{R}^m \mid y^T A_T \leq 0, y^T A_{N \setminus T} = 0, y \geq 0, y_i > 0\}, \quad (4)$$

where  $N = 1, \dots, n$ .

*Proof.* Applying Lemma 1 to the  $(m + |T|) \times n$  matrix  $\begin{bmatrix} A \\ (I_T)^T \end{bmatrix}$ , shows that exactly one of the following sets is empty (non-empty) for some  $i \in 1, \dots, m$ :

$$\{w \in \mathbb{R}^n \mid \begin{bmatrix} A \\ (I_T)^T \end{bmatrix} w \geq 0, (Aw)_i > 0\} \quad (5)$$

$$\{y \in \mathbb{R}^m, s \in \mathbb{R}^{|T|} \mid [y \ s]^T \begin{bmatrix} A \\ (I_T)^T \end{bmatrix} = 0, y \geq 0, s \geq 0, y_i > 0\}. \quad (6)$$

Eq. 5 can be rewritten as Eq. 3, while Eq. 6 can be rewritten as:

$$\{y \in \mathbb{R}^m, s \in \mathbb{R}^{|T|} \mid y^T A_{N \setminus T} = 0, y^T A_T + s = 0, y \geq 0, s \geq 0, y_i > 0\} \quad (7)$$

The set in Eq. 7 is empty (non-empty) if and only if the set in Eq. 4 is empty (non-empty), which proves the lemma.  $\square$

A species  $i$  is producible under nutrient media  $U$ , stoichiometry matrix  $S$ , and irreversible reactions  $T$  if and only if the following set is nonempty:

$$\{u \in \mathbb{R}^{|U|}, v \in \mathbb{R}^n \mid \bar{S} \begin{bmatrix} u \\ v \end{bmatrix} \geq 0, (\bar{S} \begin{bmatrix} u \\ v \end{bmatrix})_i > 0, v_T \geq 0\}, \quad (8)$$

where

$$\bar{S} = [I_U \ S] \in \mathbb{R}^{m \times (|U| + n)}. \quad (9)$$

Applying Lemma 2 to  $\bar{S}$ , this is equivalent to the emptiness of:

$$\{g \in \mathbb{R}^m \mid g^T \bar{S}_T \leq 0, g^T \bar{S}_{N \setminus T} = 0, g \geq 0, g_i > 0\}, \quad (10)$$

which can be rewritten as

$$\{g \in \mathbb{R}^m \mid g^T S_T \leq 0, g^T S_{N \setminus T} = 0, g \geq 0, g_i > 0, g_U = 0\} \quad (11)$$

Let us define the polyhedral cone of *semipositive subconservation relations* associated with metabolic network  $S$  with irreversible reactions  $T$  as:

$$G_s = \{g \in \mathbb{R}^m \mid g^T S_T \leq 0, g^T S_{N \setminus T} = 0, g \geq 0\}. \quad (12)$$

Let  $E_s$  be the extreme rays of  $G_s$ , then the emptiness of the set in Eq. 11 is equivalent to:

$$P_i(E_s) \subseteq P_U(E_s). \quad (13)$$

Given  $E_s$ , the set of *extreme semipositive subconservation relations*, Eq. 13 forms a necessary and sufficient condition for producibility in the context of thermodynamic constraints.
